1 **Title:** Animal movement in pastoralist populations and implications for pathogen spread and  
2 control

3 **Author names and affiliations**

4 George P. Omondi <sup>a, b\*</sup>, Vincent Obanda <sup>b, c</sup>, Kimberly VanderWaal <sup>a</sup>, John Deen <sup>a</sup>, Dominic A.  
5 Travis <sup>a</sup>

6 <sup>a</sup> Department of Veterinary Population Medicine, College of Veterinary Medicine, University of  
7 Minnesota, St. Paul, MN

8 <sup>b</sup> Ahadi Veterinary Resource Center, P.O. Box 51002 – 00200, Nairobi, Kenya

9 <sup>c</sup> Veterinary Services Department, Kenya Wildlife Service, P.O. Box 40241 – 00100, Nairobi,  
10 Kenya

11 \* Corresponding author

12 **Abstract**

13 Infectious diseases are one of the most important constraints to livestock agriculture, and  
14 hence food, nutritional and economic security in developing countries. In any livestock system,  
15 the movement of animals is key to production and sustainability. This is especially true in  
16 pastoralist systems where animal movement occurs for a myriad of social, ecological, economic  
17 and management reasons. Understanding the dynamics of livestock movement within an  
18 ecosystem is important for disease surveillance and control, yet there is limited data available on  
19 the dynamics of animal movement in such populations. The aim of this study was to investigate  
20 animal transfer networks in a pastoralist community in Kenya, and assess network-based strategies  
21 for disease control. We used network analysis to characterize five types of animal transfer  
22 networks and evaluated implications of these networks for disease control through quantifying  
23 topological changes in the network because of targeted or random removal of nodes. To construct

24 these networks, data were collected using a standardized questionnaire (N=164 households) from  
25 communities living within the Maasai Mara Ecosystem in southwestern Kenya. The median  
26 livestock movement distance for agistment (dry season grazing) was 39.49 kilometers (22.03-  
27 63.49 km), while that for gift, bride price, buying and selling were 13.97 km (0-40.30 km), 30.75  
28 km (10.02-66.03 km), 31.14 km (17.56-59.08 km), and 33.21 km (17.78-58.49 km), respectively.  
29 Our analyses show that the Maasai Mara National Reserve, a protected area, was critical for  
30 maintaining connectivity in the agistment network. In addition, villages closer to the Maasai Mara  
31 National Reserve were regularly used for dry season grazing. In terms of disease control, targeted  
32 removal of highly connected village nodes was more effective at fragmenting each network than  
33 random removal of nodes, indicating that network-based targeting of interventions such as  
34 vaccination could potentially disrupt transmission pathways and reduce pathogen circulation in the  
35 ecosystem. In conclusion, this work shows that animal movements have the potential to shape  
36 patterns of disease transmission and control in this ecosystem. Further, we show that targeted  
37 control is a more practical and efficient measure for disease control.

38 **Keywords:** Maasai Mara, Network analysis, Disease control, Animal transfer, Fragmentation  
39 index, Pastoralist Mobility

40

41

## 42 **Introduction**

43 Rangeland ecosystems in Africa, defined as areas of natural or semi-natural vegetation in  
44 arid or semi-arid climates, host large numbers of wildlife, livestock, and marginalized pastoralist  
45 populations (Homewood, 2004; Le Houerou, 2012). Low rainfall and seasonally heterogeneous  
46 resources characterize such areas, which necessitates human and livestock mobility to utilize

47 spatiotemporally distributed resources (Swallow, 1994; Butt, 2010; Goldman and Riosmena, 2013;  
48 Turner and Schlecht, 2019). However, animal movements have been shown to impact disease  
49 patterns (Fevre et al., 2006; Altizer et al., 2011), especially among pastoral communities (Rajeev  
50 et al., 2017; Sintayehu et al., 2017; VanderWaal et al., 2017), where losses emanating from  
51 livestock diseases affect livelihoods, and their control has the potential to enhance household  
52 productivity and health outcomes (Marsh et al., 2016). Rangeland systems are especially at high  
53 risk for pathogen introduction and spread because grazing livestock interact with both wildlife and  
54 other livestock directly and indirectly through shared forage and water resources (Rajeev et al.,  
55 2017). Thus, control of infectious diseases in livestock systems requires an understanding of  
56 interaction not only between herds but also in different locations (Bastos et al., 2000; Fevre et al.,  
57 2006; zu Dohna et al., 2014; Machado et al., 2019; Omondi et al., 2019).

58         Patterns of contact between livestock herds influences the spread of infectious pathogens  
59 (Fevre et al., 2006) and thus can be used to characterize epidemiological dynamics (Kao et al.,  
60 2006; VanderWaal et al., 2016; VanderWaal et al., 2017) and develop targeted surveillance and  
61 control strategies (Bajardi et al., 2012; Frossling et al., 2014; Ribeiro-Lima et al., 2015). Herds  
62 with high rates of between-herd contacts have a higher risk of acquiring infections (VanderWaal  
63 et al., 2017). In addition, infections often propagate from a small number of actors (Woolhouse et  
64 al., 1997; Volkova et al., 2010), with so-called “super-spreaders” disproportionately contributing  
65 to transmission events (Lloyd-Smith et al., 2005). Thus, characterizing the underlying architecture  
66 of contact patterns within a population can help elucidate important drivers and pathways for  
67 disease transmission as well as critical points for surveillance and control (Bajardi et al., 2012;  
68 VanderWaal et al., 2016).

69 Pastoralists have adopted a strategy of complex livestock movement to maximize the  
70 utilization of seasonally available resources, leading to complex heterogeneous contact patterns  
71 and variability in disease outcomes (Dejene et al., 2016; Rajeev et al., 2017; Sintayehu et al., 2017;  
72 Turner and Schlecht, 2019). In such communities, livestock movement data is seldom available,  
73 and thus contact is difficult to characterize. Several studies have attempted to model livestock  
74 movement by analyzing sales records (Chaters et al., 2019), animal transaction records combined  
75 with questionnaire surveys (Motta et al., 2017), census of migrating pastoralists (Pomeroy et al.,  
76 2019), Global Positioning System data loggers (VanderWaal et al., 2017), and ego-based  
77 approaches (Bronsvort et al., 2004). However, none of the methods above captures the diversity  
78 of social drivers behind movements within pastoral cultural systems. For instance, in addition to  
79 buying and selling, Maasai pastoralists move animals, with or without the transfer of ownership,  
80 for instance for bride price payments, lending of animals between friends and families, gifts, and  
81 for seasonal access to pasture and water (Perlov, 1987 in (Aktipis et al., 2016). In pastoralist  
82 populations, moving or sharing animals is both a survival strategy, a relationship building exercise,  
83 and often a method of risk pooling (Aktipis et al., 2011; Aktipis et al., 2016). Pastoralists  
84 communities are known to use gifts of livestock as a means to build and enhance relationships (de  
85 Vries et al., 2006). The role that such livestock movements play in disease dissemination is seldom  
86 evaluated, but may be key to maximizing productivity of this management system (Sintayehu et  
87 al., 2017).

88 Designing control strategies is complex, and traditional epidemiological approaches often  
89 fail to capture the dynamic, non-linear, and interconnected nature of pastoral systems (Benham-  
90 Hutchins and Clancy, 2010). To further our understanding of cattle-associated movement  
91 dynamics, graph theory can be used to quantify within- and- between village movements such that

92 household actions, for instance buying/selling, connect different villages. Such between-village  
93 connections are expected to be important when developing disease surveillance and intervention  
94 strategies (Watts, 1987; Woolhouse et al., 1997; Sintayehu et al., 2017; Ahmed et al., 2018; Russell  
95 et al., 2018). In graph theory, networks are used to characterize interacting systems in which nodes  
96 (here defined as households or villages) are inter-connected through edges (here defined as  
97 movements (Craft and Caillaud, 2011; Danon et al., 2011; Silk et al., 2017; Sintayehu et al., 2017;  
98 Balasubramaniam et al., 2018; Ogola et al., 2018). In our study, a network edge is a potential route  
99 for transmission of pathogens between households through the movement of animals. Using  
100 network analysis, we can calculate centrality metrics to evaluate the importance of a node in  
101 connecting the network, investigate the propagation of a hypothetical disease, and assess the  
102 potential for targeted surveillance or control if a node is removed - a measure equivalent to  
103 vaccination or depopulation (Martinez-Lopez et al., 2009; Kinsley et al., 2019; Yang et al., 2019).  
104 In this study, our objective was to use network analysis to characterize different types of animal  
105 movement, and evaluate their potential role in disease transmission and control in a pastoralist  
106 community in Kenya. We hypothesized that villages proximal to Maasai Mara National Reserve  
107 will play an important role in the connectivity of the ecosystem, as measured by their centrality  
108 metrics, and that targeted control measures aimed at villages with the most connections will be  
109 more efficient at fragmenting the connectivity of the network than a non-targeted approach. This  
110 study advances our understanding of the movement dynamics of livestock within a pastoralist  
111 community characterized by variable animal transfer pathways and their role in network-based  
112 interventions for livestock disease surveillance and control.

## 113 **Material and Methods**

114 **Study site:** This study examined the dynamics of livestock movement in pastoralist  
115 communities living within the Maasai Mara Ecosystem (MME) (Figure 1). MME is located in  
116 southwestern Kenya, and encompasses the 1,530 km<sup>2</sup> MMNR, within which livestock grazing is  
117 banned and adjoining pastoral ranches where communal settlements, livestock grazing, and  
118 tourism are permitted (Bhola et al., 2012). The livestock movement dynamics of the communities  
119 in this ecosystem are driven by the Maasai Mara National Reserve (MMNR) due to the availability  
120 of forage within this wildlife conservation area during the dry season (Reid et al., 2003; Butt et al.,  
121 2009). Rainfall in this ecosystem is largely bimodal, varying from 500 mm in the southeast to 1300  
122 mm in the northwest (Bartzke et al., 2018). These factors combine to create spatiotemporal  
123 heterogeneity in water and forage distribution, which influences wild herbivores and domestic  
124 stock movement within the ecosystem. This ecosystem is located within the larger Narok County,  
125 which is a 17,953 km<sup>2</sup> area with more than one million cattle, 2.3 million sheep and goats, and a  
126 human population that is largely rural (KNBS, 2010).

127

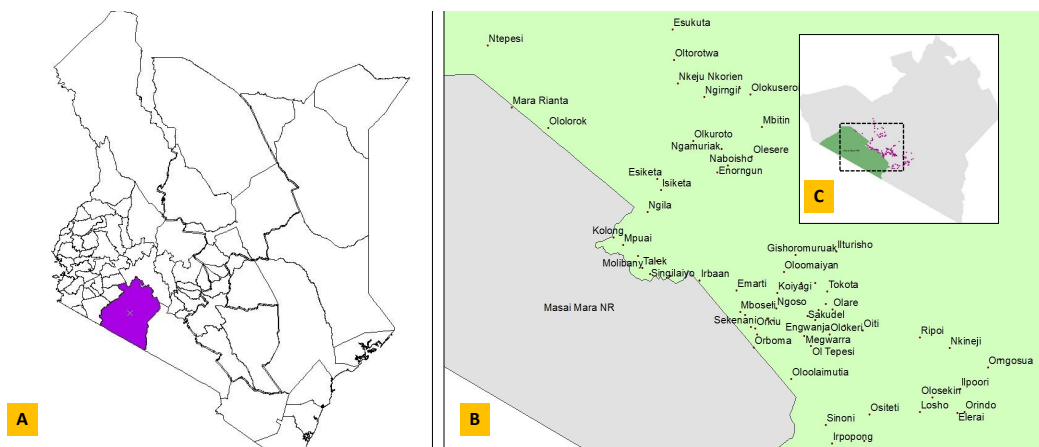

128

129 **Figure 1:** Map of the Maasai Mara Ecosystem. A. Map of Kenya with Narok County in red; B.  
130 Unique villages sampled in this study; C. Map of Narok County with households sampled marked  
131 in purple, dotted square represents an area equivalent to B.

132

133 ***Data collection***

134           This research is part of a larger study aimed at understanding zoonotic disease occurrence  
135 in the Maasai Mara Ecosystem, with all sampling conducted between November 2017 and June  
136 2019. We defined households as persons living within an abode for a period of one month prior to  
137 the sampling, and herds as groups of cattle, sheep and goats, and any other domestic stock owned  
138 by the respondent. We purposively sampled one hundred and sixty four households, targeting those  
139 within 20 kilometers of the Maasai Mara National Reserve. Pastoral cattle tend to move longer  
140 daily distances than small stock, with an average of 2-9 kilometers being the norm for grazing  
141 (Turner and Schlecht, 2019). For longer-term migration, or “travel mobility,” in pastoralist  
142 systems, the average distance moved ranges from 47-170 kilometers (Turner and Schlecht, 2019),  
143 with the wide variation indicative of an individual household’s cost-benefit valuation of the move.

144           For this study, we defined five animal transfer pathways identified from an initial scoping  
145 survey in the ecosystem; agistment (defined as the temporary re-location of animals to access  
146 forage and water in other locations during the dry season, usually lasting 2-3 months, while  
147 maintaining a household in a single village), gift, bride price, buying, and selling. We interviewed  
148 a household respondent using a structured questionnaire, in which the respondent was asked to  
149 identify villages (by common name) from which they either sent or received animals through any  
150 of the aforementioned pathways over the last five years. The respondents were requested to name  
151 villages rather than specific household due to the logistical constraints of collecting locational data  
152 on households named by respondents. For each household interviewed and village named,  
153 locational data was recorded using a handheld Global Positioning System; a centroid was  
154 calculated to represent the location of villages in which multiple household locations were  
155 recorded. The University of Minnesota IRB (STUDY00000837), Kenya Wildlife Service

156 (KWS/BRM/5001), and the Narok County government (NCG/HEALTH/GEN/VOL.1/2)  
157 authorized this study.

158

### 159 ***Data analysis***

160 *Network construction:* In graph theory, nodes can be partitioned into  $k$  independent sets or groups.  
161 A network with  $k \geq 3$  is a *multipartite* network, whereas those with one or two independent sets or  
162 groups are *unipartite* and *bipartite* networks, respectively (Jacoby and Freeman, 2016). We  
163 constructed a household-village bipartite network, where households are linked to villages to  
164 which they received or moved animals. In this study, a separate bipartite network was constructed  
165 for each type of contact. In a bipartite network  $B = \{U, V, E\}$ , where  $U$  and  $V$  are the disjoint set  
166 of nodes representing households and villages, respectively, and  $E$  is the linkage between nodes,  
167 such as  $E = \{(u, v): u \in U, v \in V\}$ . In this network, nodes in  $U$  can only connect to nodes in  $V$ , and  
168 no connections among nodes of the same type exist (Banerjee et al., 2017). This representation of  
169 contact is appropriate for the method by which data were collected for this project (households  
170 were asked about movements of animals to different villages). These data can be represented by  
171 an unweighted biadjacency matrix  $B = \{U, V, E\}$ , which is a  $(0, 1)$  matrix of size  $|U| \times |V|$ ;  $B_{uv} = 1$  if  
172 there is an edge between  $u$  and  $v$ , or  $B_{uv} = 0$  when there is none. Thus, households are connected  
173 to other households indirectly based on villages to which they had common connections. In this  
174 sense, each set of nodes (villages and households) have independent properties that we can  
175 estimate to evaluate the roles played by each set. These properties will be evaluated at two levels,  
176 first, a household's role within the network, and secondly the villages' role in the network.

177



178 *Network metrics:* At the node-level, we calculated two centrality metrics: degree and betweenness.  
179 We also summarized the density and fragmentation index of the network as a whole (Table 1), and  
180 visualized network topology. All analysis were conducted using the *igraph* package (Csardi,  
181 2013).

182

183

| Node-level Metrics    |                                                                                                                   | Citation                    |
|-----------------------|-------------------------------------------------------------------------------------------------------------------|-----------------------------|
| Degree                | Total number of unique nodes that sent or received an animal to/from a particular node.                           | (Wasserman and Faust, 1994) |
| Betweenness           | Number of times a node is located on the shortest path between any two pairs of nodes within the observed network | (Wasserman and Faust, 1994) |
| Network-level Metrics |                                                                                                                   |                             |
| Density               | Number of observed contacts in the network relative to all possible contacts.                                     | (Wasserman and Faust, 1994) |
| Fragmentation index   | Proportion of pairs of nodes that are disconnected (no paths exist connecting them) in the network.               | (Chen et al., 2007)         |

184 **Table 1:** Definition of network metrics

185

186

187 *Implications of node removal:* We used two approaches for node removal, random and targeted.  
188 In random removal, we selected any 2, 5, or 10 nodes at random, calculated network-level metrics  
189 before and after removal, and repeated this process for 1,000 iterations to generate an expected  
190 distribution. For targeted removal, we selected top 2, 5, and 10 nodes based on degree, and  
191 recalculated the network-level metrics before and after removal (Albert et al., 2000; Holme et al.,  
192 2002; Chen et al., 2007). We quantified the topological impact of removing nodes using the  
193 fragmentation index,  $F$ , which is the proportion of non-connected pairs of nodes in the network.  $F$   
194 = 0 would represent a fully-connected, non-fragmented network in which all pairs of nodes are

195 connected through paths in the network, and  $F = 1$  would represent a fully fragmented network  
196 where every node is isolated (Borgatti, 2006; Chen et al., 2007).

197

## 198 **Results**

199 We sampled 164 households in 67 unique villages (Figure 1 B) across the Maasai Mara Ecosystem,  
200 with 30% of the respondents being female (50/164), 70% male (114/164), and the median length  
201 of time they had lived in the area being 8 years (4 -100 years). Of the respondents interviewed,  
202 99% identified as pastoralists, though 12% also reported formal employment, and 4% were  
203 merchants involved in various trades.

204 *Network metrics and visualization:* Five animal movement ‘reasons’ were examined; agistment,  
205 bride price, gift, buying, selling. The median livestock movement distance for agistment was 39.49  
206 kilometers (22.03-63.49 km), while that for gift, bride price, buying, and selling were 13.97 km  
207 (0-40.30 km), 30.75 km (10.02-66.03 km), 31.14 km (17.56-59.08 km), and 33.21 km (17.78-  
208 58.49 km), respectively. For agistment, gift, bride price, buying and selling networks, network  
209 densities were 0.0038, 0.0023, 0.0022, 0.0082, and 0.0056, respectively. In addition, we  
210 summarized the degree of the villages and the households in our networks separately. The median  
211 household degrees in agistment, gift, bride price, buying and selling network node degrees were 2  
212 (interquartile range: 1-2), 1 (0-1), 1 (1-2), 2 (1-3), and 2 (1-3), respectively. We report the median  
213 degree for households only, as the interpretation of degree for villages is less straight forward  
214 because some villages were identified by a respondent but not sampled during questionnaire  
215 interviews. With that caveat, seven villages were shown to be important across all networks. These  
216 included Sekenani, Talek, Ololaimutia, Nkineji, Olesere, Nkoilale and Naikara (Table 2). Of the

217 villages evaluated, Maasai Mara National Reserve (though technically not a village) had the  
218 highest degree and betweenness for agistment (Table 2).

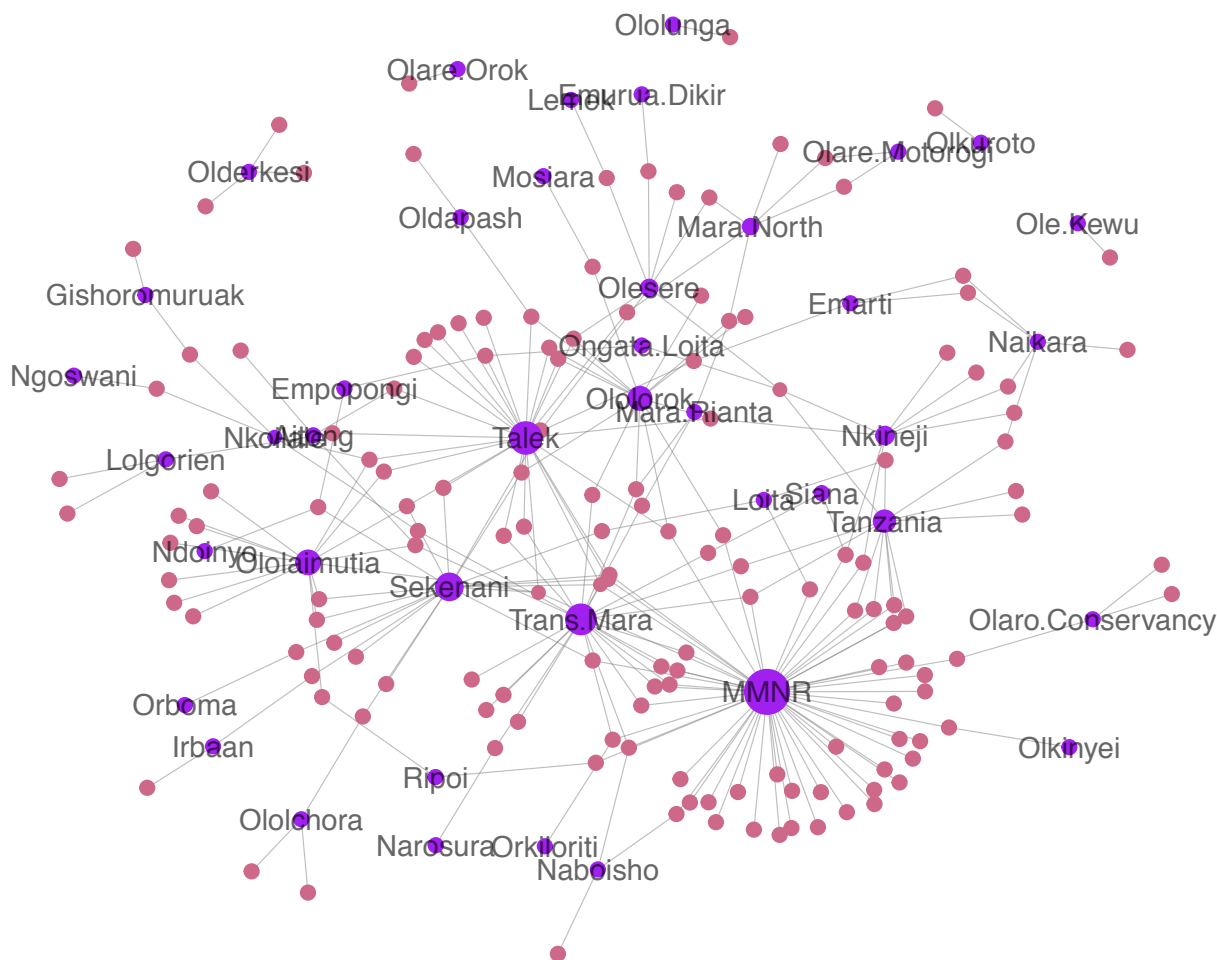

219  
220 **Figure 2:** Agistment Network: Bipartite network of agistment locations within the Maasai Mara  
221 ecosystem, with node sizes scaled by degree. Purple nodes are villages, while pale violet nodes are  
222 households.

223

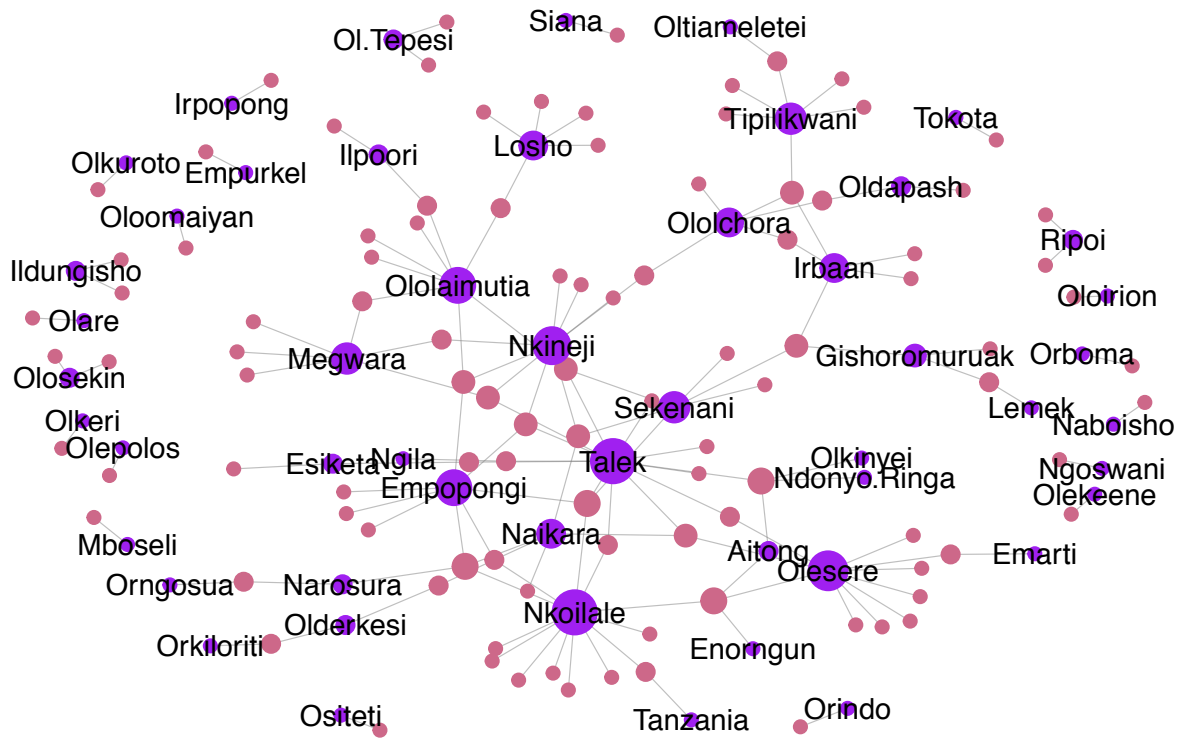

224

225 **Figure 3:** Gift Network: Bipartite network of gift locations within the Maasai Mara ecosystem,  
226 with node sizes scaled by degree. Purple nodes are villages, while pale violet nodes are  
227 households.

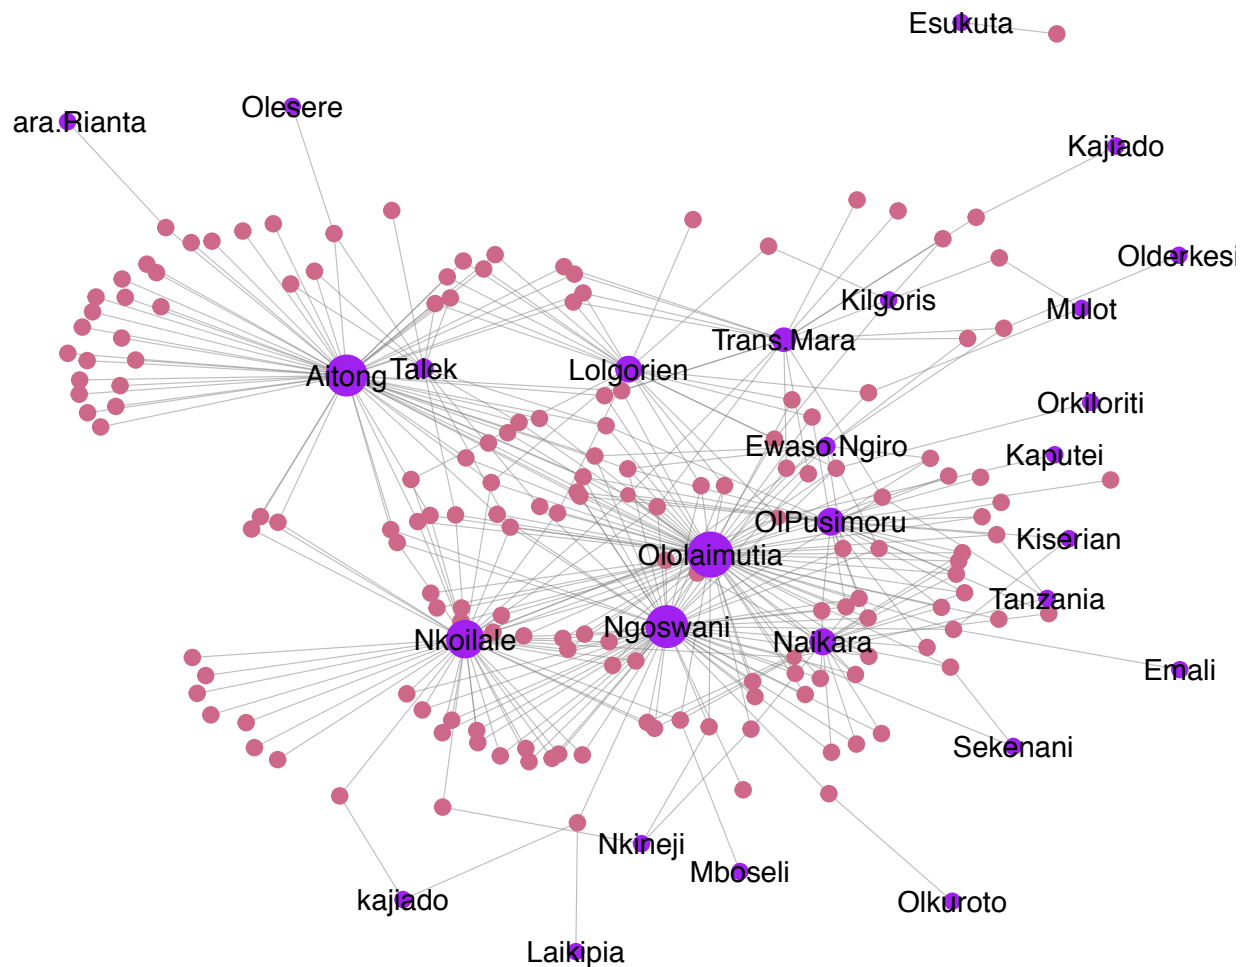

228

229 **Figure 4:** Buying Network: Bipartite network of major buying locations within the Maasai Mara  
230 ecosystem, with node sizes scaled by degree. Purple nodes are villages, while pale violet nodes are  
231 households.

232

233 *Implications of node removal:* We used the fragmentation index to examine changes in network  
234 topology following the targeted and random removal of nodes in the five networks. Consistent  
235 with our hypothesis, targeted removal outperformed random removal of nodes in terms of  
236 increasing network fragmentation. The fragmentation indices of the full networks were 0.51, 0.83,  
237 0.93, 0.45 and 0.47 for agistment, gift, bride price, buying and selling, respectively. Across all  
238 network types, targeted removal of nodes based on their degree resulted in substantially higher

239 fragmentation than random removal of nodes; the fragmentation indices for the targeted removals  
240 always exceeded the upper bounds of the 95% interval that was achieved through random  
241 removals. This result was consistent regardless of whether the top 2, 5, or 10 nodes with highest  
242 degree were removed (Table 2). The biggest change in fragmentation was realized when five nodes  
243 were targeted for removal, with only a modest additional benefit in removing 10 nodes as opposed  
244 to five (complete list of figures are included in the supplementary materials).

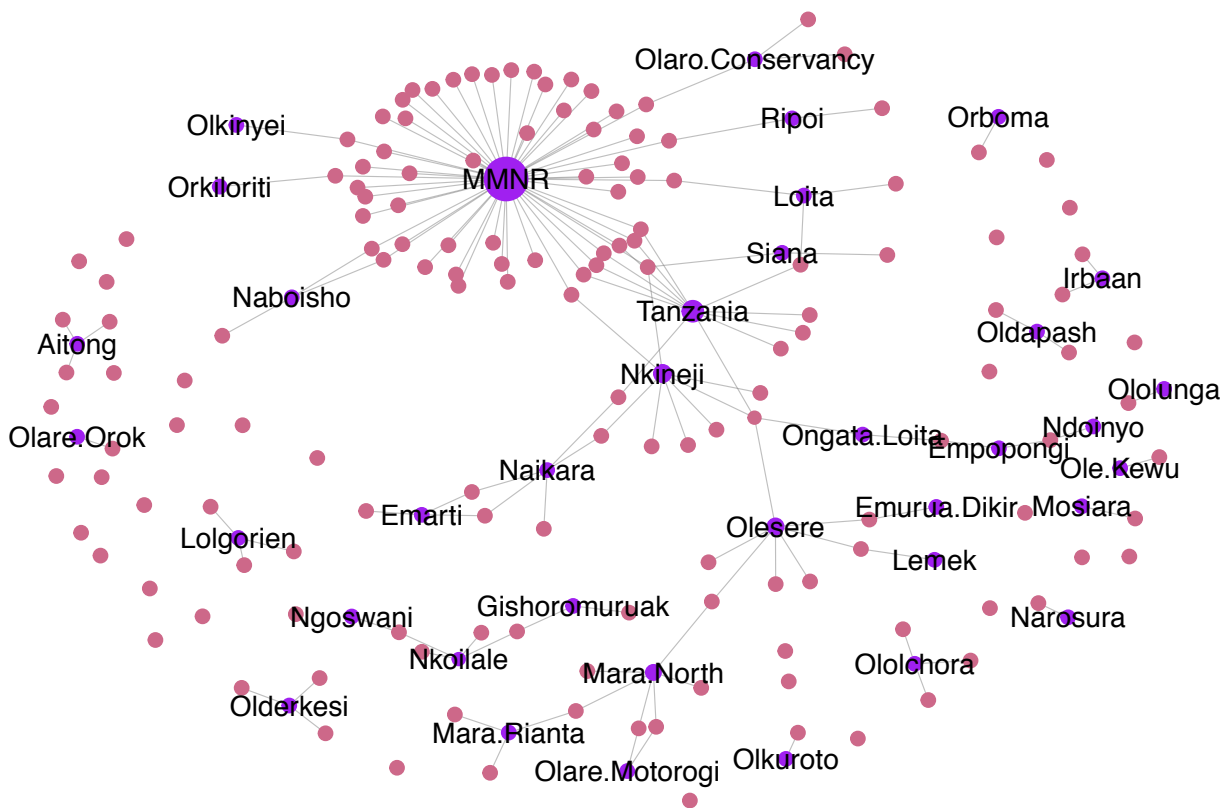

245

246 **Figure 5:** Bipartite network of agistment locations following targeted removal of top five villages.  
247 Purple nodes are villages, while pale violet nodes are households.

| Agistment                |     |       | Gift                     |     |       | Bride Price           |     |       | Buying                   |     |       | Selling                  |     |       |
|--------------------------|-----|-------|--------------------------|-----|-------|-----------------------|-----|-------|--------------------------|-----|-------|--------------------------|-----|-------|
| VILL                     | DGR | BETWN | VILL                     | DGR | BETWN | VILL                  | DGR | BETWN | VILL                     | DGR | BETWN | VILL                     | DGR | BETWN |
| MMNR *                   | 54  | 10348 | Talek <sup>ψ</sup>       | 13  | 2006  | Nkoilale <sup>ψ</sup> | 7   | 836   | Ololaimutia <sup>ψ</sup> | 72  | 6311  | Ngoswani                 | 91  | 7791  |
| Sekenani <sup>ψ</sup>    | 19  | 7534  | Sekenani <sup>ψ</sup>    | 6   | 1645  | Ololchora             | 7   | 677   | Aitong                   | 59  | 6293  | Aitong                   | 71  | 7538  |
| Talek <sup>ψ</sup>       | 27  | 4646  | Ololaimutia <sup>ψ</sup> | 8   | 1265  | Olesere <sup>ψ</sup>  | 6   | 580   | Ngoswani                 | 62  | 4899  | Ololaimutia <sup>ψ</sup> | 47  | 3139  |
| Trans Mara               | 24  | 2718  | Nkoilale <sup>ψ</sup>    | 13  | 1225  | Tanzania              | 5   | 471   | Nkoilale <sup>ψ</sup>    | 49  | 3496  | Ewaso Ngiro              | 47  | 2062  |
| Ololaimutia <sup>ψ</sup> | 15  | 1905  | Irbaan                   | 5   | 1016  | Sekenani <sup>ψ</sup> | 6   | 454   | Trans Mara               | 18  | 1673  | Nkoilale <sup>ψ</sup>    | 36  | 1627  |
| Ololorok                 | 14  | 1822  | Nkineji <sup>ψ</sup>     | 9   | 993   | Empopongi             | 4   | 451   | Lolgorien                | 22  | 1138  | Dagoretti                | 32  | 994   |
| Nkineji <sup>ψ</sup>     | 8   | 1400  | Olesere <sup>ψ</sup>     | 10  | 858   | Tipilikwani           | 5   | 444   | Ol Pusimoru              | 24  | 754   | Naikara <sup>ψ</sup>     | 17  | 250   |
| Olesere <sup>ψ</sup>     | 7   | 1047  | Empopongi                | 8   | 709   | Nkineji <sup>ψ</sup>  | 3   | 314   | Naikara <sup>ψ</sup>     | 22  | 451   | Lolgorien                | 4   | 26    |
| Nkoilale <sup>ψ</sup>    | 4   | 914   | Naikara <sup>ψ</sup>     | 5   | 689   | Megwara               | 4   | 313   | Talek <sup>ψ</sup>       | 11  | 370   | Ol Pusimoru              | 3   | 8     |
| Mara North               | 6   | 707   | Tipilikwani              | 6   | 614   | Talek <sup>ψ</sup>    | 4   | 224   | Ewaso Ngiro              | 9   | 285   | Sekenani <sup>ψ</sup>    | 2   | 6     |
| Naikara <sup>ψ</sup>     | 5   | 521   |                          |     |       |                       |     |       |                          |     |       |                          |     |       |
| Tanzania *               | 12  | 483   |                          |     |       |                       |     |       |                          |     |       |                          |     |       |

249

250

251

252 **Table 2:** Network metrics; degree and betweenness of the top 10 villages in the five networks evaluated in this study. \* Not a village  
 253 within the ecosystem but serves as an important hub in the network – this was only in the agistment network. <sup>ψ</sup> Villages that are common  
 254 across all evaluated networks. VILL = Village; DGR = degree; BETWN = betweenness.

255

256

257

258

259

260  
261  
262

| Fragmentation of the network following targeted versus random node removal |              |                       |                  |                       |                  |                        |                  |
|----------------------------------------------------------------------------|--------------|-----------------------|------------------|-----------------------|------------------|------------------------|------------------|
| Reason                                                                     | Full Network | Removal of 2 villages |                  | Removal of 5 villages |                  | Removal of 10 villages |                  |
|                                                                            | Targeted     | Random                | Targeted         | Random                | Targeted         | Random                 | Targeted         |
| Buying                                                                     | 0.45         | 0.54                  | 0.48 (0.45-0.59) | 0.86                  | 0.53 (0.47-0.67) | 1.00                   | 0.64 (0.51-0.82) |
| Selling                                                                    | 0.47         | 0.71                  | 0.49 (0.47-0.66) | 0.94                  | 0.56 (0.49-0.73) | 1.00                   | 0.75 (0.52-0.89) |
| Agistment                                                                  | 0.51         | 0.61                  | 0.54 (0.52-0.59) | 0.81                  | 0.58 (0.53-0.65) | 0.90                   | 0.64 (0.57-0.74) |
| Gift                                                                       | 0.83         | 0.89                  | 0.84 (0.83-0.87) | 0.96                  | 0.86 (0.83-0.91) | 0.99                   | 0.89 (0.85-0.94) |
| Bride Price                                                                | 0.93         | 0.97                  | 0.94 (0.93-0.96) | 0.99                  | 0.95 (0.94-0.98) | 1.00                   | 0.97 (0.95-0.99) |

263  
264  
265  
266  
267

**Table 3:** Network metrics; fragmentation index of the five networks evaluated in this study following the removal of 2, 5 and 10 nodes, with nodes removed either selected randomly or targeted based on degree. For random removals, the median (95% confidence interval) fragmentation is reported, summarized across 1,000 iterations.



## 268 **Discussion**

269 In this study, our goal was to characterize animal transfer networks in pastoralist communities  
270 in Kenya, and evaluate their potential role in disease control and management. As described in Table  
271 1, degree, betweenness, density, and fragmentation index are important measures of a network's  
272 topology and for assessing potential impact of perturbing this topology for disease control  
273 (Wasserman and Faust, 1994; Chen et al., 2007). We showed that animals were moved the longest  
274 distances (median = 39.49 km) for agistment (movement of animals to forage and water during the  
275 dry season), followed by bride price, buying and selling, which were approximately similar (ranging  
276 between 30-33 km). Finally, movement due to gifting was more localized (with the lowest median  
277 distance at 13.97 km). Thus this study shows that buying, selling and agistment driven movements  
278 potentially play a bigger role than gift and bride price in disease propagation risk (with respect to  
279 both higher network densities and longer distance of movement). The protected area, Maasai Mara  
280 National Reserve, played an important role in connecting the ecosystem in that it was highly used for  
281 dry season grazing, as shown by its highest degree and betweenness. In addition, our results support  
282 the hypothesis that villages proximal to Maasai Mara National Reserve (Sekenani, Talek, and  
283 Ololaimutia) were more connected in the ecosystem (highest centrality metrics). In all networks,  
284 targeted removal of villages served to better fragment the network than randomly removing nodes,  
285 highlighting the potential benefits of targeted disease control strategies. Thus, targeted removal, such  
286 as vaccination, may provide an efficient approach for disease control in the ecosystem.

287 The fact that villages closer to MMNR were used regularly for dry season grazing is not a  
288 surprise given that, although grazing in the reserve is banned, it has been reported previously in the  
289 literature (Ogutu et al., 2009). In this study, respondents consistently identified the Maasai Mara  
290 National Reserve as a reservoir for forage during the dry season, even in the face of animal  
291 confiscation and fines levied by the County government (personal communication). The MMNR has

292 become especially attractive following increased fencing of the ecosystem that has disrupted  
293 traditional animal foraging routes and grazing lands (Løvschal et al., 2017). Further, though buying  
294 and selling median distances were identical, a closer look at the network topology reveals more  
295 context. First, buying commonly includes transactions with villages outside Narok County (the study  
296 area). For instance, the respondents indicated that they bought their cattle from Tanzania, Kajiado,  
297 Kiserian, Emali, and Laikipia, all of which fall outside the county boundaries. This could be a strategy  
298 to acquire different or “better” livestock genetics (Ilatsia et al., 2012). On the contrary, selling of  
299 livestock mostly occurred in local markets. These included major markets such as Aitong, Nkoilale,  
300 Ololaimutia, Ewaso Ngiro, and Ol Pusimoru. In addition, a few farmers sold livestock in larger, peri-  
301 urban markets (e.g. Dagoretti, Ngong and Ongata Rongai) serving the capital city of Nairobi, possibly  
302 as a means of getting higher returns (Alarcon et al., 2017).

303 Network-based disease control relies on identifying a population’s contact structure and  
304 evaluating the role of the different nodes (e.g. villages, households, or farms) that could influence  
305 connectivity thus fragmenting the transmission network (Kiss et al., 2005; Tanaka et al., 2014). To  
306 evaluate the efficiency of network-based control strategies, we compared the effect of random versus  
307 targeted removal of nodes on the networks’ topological structure using the fragmentation index.  
308 Random removal of nodes requires no prior information on the network structure, but has been shown  
309 to be an inefficient approach (Albert et al., 2000). In our study, targeted removal of village nodes  
310 outperformed random removal, demonstrating the utility of network analysis in identifying highly  
311 connected villages that could be used for more strategic disease control or surveillance. Here, node  
312 removal mimics vaccination or depopulation, depending on the disease and context of infectious  
313 disease control (Keeling and Eames, 2005; Bansal et al., 2010). Ideally, an efficient fragmentation  
314 strategy should be one that removes minimal number of nodes as it represents, for instance, the  
315 minimum number of villages to be vaccinated to prevent further spread of an infection (Chen et al.,

2007). We demonstrated that the removal of the top five nodes with the highest degree was effective at fragmenting all the networks. The agistment network, however, was more robust to node removal in that the removal of top 5 or 10 villages resulted in fragmentation indices of 81% and 90%, whereas this value was close to 100% for the other networks in this study. This might be due to the fact that, we cannot remove MMNR from the network or that household decisions to move to a particular location is highly influenced by an individual household's cost-benefit analysis of the move independent of other household decisions (Turner and Schlecht, 2019). This is unlike buying and selling, which follow the law of supply and demand, and sometimes are dictated by intermediaries (Alemayehu, 2011; Alarcon et al., 2017; Chaters et al., 2019).

Agistment, buying, and selling networks occur much more frequently with potentially greater implications for pathogen dissemination than gifting and bride price (Macpherson, 1995; Bett et al., 2009). Anecdotally, we may conclude that the fragmentation of the selling network may serve to protect markets outside the Mara Ecosystem, such as Dagoretti, Ngong and Ongata Rongai. On the contrary, the fragmentation of the buying network leaves the markets in the neighboring counties connected to those in the Maasai Mara Ecosystem (Supplementary material) and may need to be considered when designing a comprehensive disease control strategy.

Our study has several limitations. First, data were collected at a single time point, and temporal changes in a network's topology is a common phenomenon, especially in pastoralist production systems (VanderWaal et al., 2017; Pomeroy et al., 2019). Secondly, respondents were asked about movements made during the last five years, which limits the temporal resolution of when movements occurred and introduces potential recall bias. Third, because data were collected in a defined geographical area, the results may not be readily generalizable to other areas. Finally, our network structure did not account for common areas of daily contact, such as congregation during daily herding and at water resources, which may be important for localized disease transmission.

340 Thus, our networks may under-represent connectivity amongst villages, particularly at local scales.  
341 However, our networks do represent longer distance movements in the ecosystem, with  
342 corresponding implications for longer distance pathogen spread.

343

## 344 **Conclusions**

345 We have shown that the identification of highly connected villages could be beneficial in designing  
346 disease control programs that fragment potential transmission pathways in the livestock population.  
347 This fragmentation can be achieved through immunization of a node (node removal). Our findings  
348 demonstrate that even at a restricted spatial scale, network centrality measures may provide sufficient  
349 information to fragment networks, thus showing their utility not only for disease control but also in  
350 developing targeted risk-based surveillance approaches. Our approach of identifying villages rather  
351 than households has multiple advantages including cost implications and protection of privacy.  
352 However, the use of bipartite networks also allows for the identification of household nodes that may  
353 be relevant in the connecting the ecosystem. There is need however, to incorporate disease data from  
354 households in the ecosystem and evaluate the network topologies with respect to real-world  
355 transmission dynamics. In addition, it may be useful to consider economic costs of the information  
356 gathering and integrate risk analysis as a way to enhance the utility and robustness of the realized  
357 networks as presented here.

358

## 359 **Acknowledgements**

360 We sincerely want to thank Samuel Soit, Joel Dukuny and James Lempoiyo for their immense help  
361 during the fieldwork portion of this research. In addition, we would like to thank the communities in  
362 the Maasai Mara Ecosystem for the patience and time in answering the questions and inquiries from  
363 the lead author. We would also like to thank the Kenya Wildlife Staff, specifically; Vasco Nyaga and

364 Stephen Ndambuki Mwiu, for their immense support to the lead author in understanding the  
365 geography of the study area, and in addition extend our immense gratitude to all the Narok County  
366 members of staff for providing linkages to the communities in the Maasai Mara Ecosystem.

### 367 **Funding sources**

368 Research reported in this publication was supported by the Department of Veterinary Population  
369 Medicine, College of Veterinary Medicine, University of Minnesota funds, and fellowship grant from  
370 the Fogarty International Center of the National Institutes of Health under Award Number  
371 D43TW009345. The content is solely the responsibility of the authors and does not necessarily  
372 represent the official views of the National Institutes of Health.

### 373 **References**

- 374 Ahmed, H., Call, D.R., Quinlan, R.J., Yoder, J.K., 2018. Relationships between livestock grazing practices,  
375 disease risk, and antimicrobial use among East African Agropastoralists. *Environment and*  
376 *Development Economics* 23, 80-97.
- 377 Aktipis, A., de Aguiar, R., Flaherty, A., Iyer, P., Sonkoi, D., Cronk, L., 2016. Cooperation in an Uncertain  
378 World: For the Maasai of East Africa, Need-Based Transfers Outperform Account-Keeping in  
379 Volatile Environments. *Hum Ecol Interdiscip J* 44, 353-364.
- 380 Aktipis, C.A., Cronk, L., de Aguiar, R., 2011. Risk-pooling and herd survival: an agent-based model of a  
381 Maasai gift-giving system. *Human Ecology* 39, 131-140.
- 382 Alarcon, P., Fèvre, E.M., Murungi, M.K., Muinde, P., Akoko, J., Dominguez-Salas, P., Kiambi, S., Ahmed, S.,  
383 Häsler, B., Rushton, J., 2017. Mapping of beef, sheep and goat food systems in Nairobi—A  
384 framework for policy making and the identification of structural vulnerabilities and deficiencies.  
385 *Agricultural systems* 152, 1-17.
- 386 Albert, R., Jeong, H., Barabási, A.-L., 2000. Error and attack tolerance of complex networks. *nature* 406, 378.
- 387 Alemayehu, K., 2011. Value chain assessment of beef cattle production and marketing in Ethiopia:  
388 Challenges and opportunities of linking smallholder farmers to the markets. *Livestock Research for*  
389 *Rural Development* 23, 255-265.
- 390 Altizer, S., Bartel, R., Han, B.A., 2011. Animal migration and infectious disease risk. *Science* 331, 296-302.
- 391 Bajardi, P., Barrat, A., Savini, L., Colizza, V., 2012. Optimizing surveillance for livestock disease spreading  
392 through animal movements. *J R Soc Interface* 9, 2814-2825.
- 393 Balasubramaniam, K., Beisner, B., Guan, J., Vandeleest, J., Fushing, H., Atwill, E., McCowan, B., 2018. Social  
394 network community structure and the contact-mediated sharing of commensal *E. coli* among  
395 captive rhesus macaques (*Macaca mulatta*). *PeerJ* 6, e4271.
- 396 Banerjee, S., Jenamani, M., Pratihar, D.K., 2017. Properties of a projected network of a bipartite network.  
397 In, 2017 International Conference on Communication and Signal Processing (ICCSP), 0143-0147.
- 398 Bansal, S., Read, J., Pourbohloul, B., Meyers, L.A., 2010. The dynamic nature of contact networks in  
399 infectious disease epidemiology. *Journal of biological dynamics* 4, 478-489.
- 400 Bartzke, G.S., Ogotu, J.O., Mukhopadhyay, S., Mtui, D., Dublin, H.T., Piepho, H.-P., 2018. Rainfall trends and  
401 variation in the Maasai Mara ecosystem and their implications for animal population and  
402 biodiversity dynamics. *PLoS one* 13, e0202814.

- 403 Bastos, A., Boshoff, C., Keet, D., Bengis, R., Thomson, G., 2000. Natural transmission of foot-and-mouth  
404 disease virus between African buffalo (*Syncerus caffer*) and impala (*Aepyceros melampus*) in the  
405 Kruger National Park, South Africa. *Epidemiology & Infection* 124, 591-598.
- 406 Benham-Hutchins, M., Clancy, T.R., 2010. Social networks as embedded complex adaptive systems. *JONA:*  
407 *The Journal of Nursing Administration* 40, 352-356.
- 408 Bett, B., Jost, C., Allport, R., Mariner, J., 2009. Using participatory epidemiological techniques to estimate  
409 the relative incidence and impact on livelihoods of livestock diseases amongst nomadic pastoralists  
410 in Turkana South District, Kenya. *Preventive veterinary medicine* 90, 194-203.
- 411 Bhola, N., Ogotu, J.O., Said, M.Y., Piepho, H.P., Olff, H., 2012. The distribution of large herbivore hotspots in  
412 relation to environmental and anthropogenic correlates in the Mara region of Kenya. *J Anim Ecol*  
413 81, 1268-1287.
- 414 Borgatti, S.P., 2006. Identifying sets of key players in a social network. *Computational & Mathematical*  
415 *Organization Theory* 12, 21-34.
- 416 Bronsvoort, B.d.C., Nfon, C., Hamman, S., Tanya, V., Kitching, R., Morgan, K., 2004. Risk factors for  
417 herdsman-reported foot-and-mouth disease in the Adamawa Province of Cameroon. *Preventive*  
418 *Veterinary Medicine* 66, 127-139.
- 419 Butt, B., 2010. Seasonal space-time dynamics of cattle behavior and mobility among Maasai pastoralists in  
420 semi-arid Kenya. *Journal of Arid Environments* 74, 403-413.
- 421 Butt, B., Shortridge, A., WinklerPrins, A.M., 2009. Pastoral herd management, drought coping strategies,  
422 and cattle mobility in southern Kenya. *Annals of the Association of American Geographers* 99, 309-  
423 334.
- 424 Chaters, G.L., Johnson, P.C.D., Cleaveland, S., Crispell, J., de Glanville, W.A., Doherty, T., Matthews, L.,  
425 Mohr, S., Nyasebwa, O.M., Rossi, G., Salvador, L.C.M., Swai, E., Kao, R.R., 2019. Analysing livestock  
426 network data for infectious disease control: an argument for routine data collection in emerging  
427 economies. *Philosophical Transactions of the Royal Society B: Biological Sciences* 374.
- 428 Chen, Y., Paul, G., Cohen, R., Havlin, S., Borgatti, S.P., Liljeros, F., Stanley, H.E., 2007. Percolation theory  
429 applied to measures of fragmentation in social networks. *Physical Review E* 75, 046107.
- 430 Craft, M.E., Caillaud, D., 2011. Network models: an underutilized tool in wildlife epidemiology? *Interdiscip*  
431 *Perspect Infect Dis* 2011, 676949.
- 432 Csardi, M.G., 2013. Package 'igraph'. Last accessed 3, 2013.
- 433 Danon, L., Ford, A.P., House, T., Jewell, C.P., Keeling, M.J., Roberts, G.O., Ross, J.V., Vernon, M.C., 2011.  
434 Networks and the epidemiology of infectious disease. *Interdiscip Perspect Infect Dis* 2011, 284909.
- 435 de Vries, D., Leslie, P.W., McCabe, J.T., 2006. Livestock Acquisitions Dynamics in Nomadic Pastoralist Herd  
436 Demography: A Case Study Among Ngisonyoka Herders of South Turkana, Kenya. *Human Ecology*  
437 34, 1-25.
- 438 Dejene, S.W., Heitkonig, I.M., Prins, H.H., Lemma, F.A., Mekonnen, D.A., Alemu, Z.E., Kelkay, T.Z., de Boer,  
439 W.F., 2016. Risk Factors for Bovine Tuberculosis (bTB) in Cattle in Ethiopia. *PLoS One* 11, e0159083.
- 440 Fevre, E.M., Bronsvoort, B.M., Hamilton, K.A., Cleaveland, S., 2006. Animal movements and the spread of  
441 infectious diseases. *Trends Microbiol* 14, 125-131.
- 442 Frossling, J., Nusinovici, S., Noremark, M., Widgren, S., Lindberg, A., 2014. A novel method to identify herds  
443 with an increased probability of disease introduction due to animal trade. *Prev Vet Med* 117, 367-  
444 374.
- 445 Goldman, M.J., Riosmena, F., 2013. Adaptive Capacity in Tanzanian Maasailand: Changing strategies to  
446 cope with drought in fragmented landscapes. *Glob Environ Change* 23, 588-597.
- 447 Holme, P., Kim, B.J., Yoon, C.N., Han, S.K., 2002. Attack vulnerability of complex networks. *Physical review E*  
448 65, 056109.
- 449 Homewood, K.M., 2004. Policy, environment and development in African rangelands. *Environmental*  
450 *Science & Policy* 7, 125-143.

- 451 Ilatsia, E.D., Roessler, R., Kahi, A.K., Piepho, H.-P., Zárata, V., 2012. Production objectives and breeding  
452 goals of Sahiwal cattle keepers in Kenya and implications for a breeding programme. *Tropical*  
453 *animal health and production* 44, 519-530.
- 454 Jacoby, D.M.P., Freeman, R., 2016. Emerging Network-Based Tools in Movement Ecology. *Trends Ecol Evol*  
455 31, 301-314.
- 456 Kao, R.R., Danon, L., Green, D.M., Kiss, I.Z., 2006. Demographic structure and pathogen dynamics on the  
457 network of livestock movements in Great Britain. *Proceedings of the Royal Society B: Biological*  
458 *Sciences* 273, 1999-2007.
- 459 Keeling, M.J., Eames, K.T., 2005. Networks and epidemic models. *J R Soc Interface* 2, 295-307.
- 460 Kinsley, A.C., Perez, A.M., Craft, M.E., Vanderwaal, K.L., 2019. Characterization of swine movements in the  
461 United States and implications for disease control. *Prev Vet Med* 164, 1-9.
- 462 Kiss, I.Z., Green, D.M., Kao, R.R., 2005. Infectious disease control using contact tracing in random and scale-  
463 free networks. *Journal of The Royal Society Interface* 3, 55-62.
- 464 KNBS, 2010. Kenya Population and Housing Census 2009. <https://www.knbs.or.ke/publications/>.
- 465 Le Houerou, H.N., 2012. The grazing land ecosystems of the African Sahel. Springer Science & Business  
466 Media.
- 467 Lloyd-Smith, J.O., Schreiber, S.J., Kopp, P.E., Getz, W.M., 2005. Superspreading and the effect of individual  
468 variation on disease emergence. *Nature* 438, 355-359.
- 469 Løvschal, M., Bøcher, P.K., Pilgaard, J., Amoke, I., Odingo, A., Thuo, A., Svenning, J.-C., 2017. Fencing bodes  
470 a rapid collapse of the unique Greater Mara ecosystem. *Scientific Reports* 7, 41450.
- 471 Machado, G., Vilalta, C., Recamonde-Mendoza, M., Corzo, C., Torremorell, M., Perez, A., VanderWaal, K.,  
472 2019. Identifying outbreaks of Porcine Epidemic Diarrhea virus through animal movements and  
473 spatial neighborhoods. *Sci Rep* 9, 457.
- 474 Macpherson, C., 1995. The effect of transhumance on the epidemiology of animal diseases. *Preventive*  
475 *Veterinary Medicine* 25, 213-224.
- 476 Marsh, T.L., Yoder, J., Deboch, T., McElwain, T.F., Palmer, G.H., 2016. Livestock vaccinations translate into  
477 increased human capital and school attendance by girls. *Science advances* 2, e1601410.
- 478 Martinez-Lopez, B., Perez, A.M., Sanchez-Vizcaino, J.M., 2009. Social network analysis. Review of general  
479 concepts and use in preventive veterinary medicine. *Transbound Emerg Dis* 56, 109-120.
- 480 Motta, P., Porphyre, T., Handel, I., Hamman, S.M., Ngwa, V.N., Tanya, V., Morgan, K., Christley, R., Barend,  
481 M., 2017. Implications of the cattle trade network in Cameroon for regional disease prevention and  
482 control. *Scientific reports* 7, 43932.
- 483 Ogola, J., Fevre, E.M., Gitau, G.K., Christley, R., Muchemi, G., de Glanville, W.A., 2018. The topology of  
484 between-herd cattle contacts in a mixed farming production system in western Kenya. *Prev Vet*  
485 *Med* 158, 43-50.
- 486 Ogutu, J.O., Piepho, H.P., Dublin, H.T., Bhola, N., Reid, R.S., 2009. Dynamics of Mara-Serengeti ungulates in  
487 relation to land use changes. *Journal of Zoology* 278, 1-14.
- 488 Omondi, G., Alkhamis, M.A., Obanda, V., Gakuya, F., Sangula, A., Pauszek, S., Perez, A., Ngulu, S., van Aardt,  
489 R., Arzt, J., VanderWaal, K., 2019. Phylogeographical and cross-species transmission dynamics of  
490 SAT1 and SAT2 foot-and-mouth disease virus in Eastern Africa. *Mol Ecol*.
- 491 Pomeroy, L.W., Moritz, M., Garabed, R., 2019. Network analyses of transhumance movements and  
492 simulations of foot-and-mouth disease virus transmission among mobile livestock in Cameroon.  
493 *Epidemics*.
- 494 Rajeev, M., Mutinda, M., Ezenwa, V.O., 2017. Pathogen Exposure in Cattle at the Livestock-Wildlife  
495 Interface. *Ecohealth* 14, 542-551.
- 496 Reid, R.S., Rainy, M., Ogutu, J., Kruska, R., Kimani, K., Nyabenge, M., McCartney, M., Kshatriya, M., Worden,  
497 J., Ng'ang'a, L., 2003. People, wildlife and livestock in the Mara ecosystem: The Mara count 2002.  
498 International Livestock Research Institute, Nairobi, Kenya.

- 499 Ribeiro-Lima, J., Enns, E.A., Thompson, B., Craft, M.E., Wells, S.J., 2015. From network analysis to risk  
500 analysis--An approach to risk-based surveillance for bovine tuberculosis in Minnesota, US. *Prev Vet*  
501 *Med* 118, 328-340.
- 502 Russell, S., Tyrrell, P., Western, D., 2018. Seasonal interactions of pastoralists and wildlife in relation to  
503 pasture in an African savanna ecosystem. *Journal of Arid Environments* 154, 70-81.
- 504 Silk, M.J., Croft, D.P., Delahay, R.J., Hodgson, D.J., Boots, M., Weber, N., McDonald, R.A., 2017. Using Social  
505 Network Measures in Wildlife Disease Ecology, Epidemiology, and Management. *Bioscience* 67,  
506 245-257.
- 507 Sintayehu, D.W., Prins, H.H., Heitkonig, I.M., de Boer, W.F., 2017. Disease transmission in animal transfer  
508 networks. *Prev Vet Med* 137, 36-42.
- 509 Swallow, B., 1994. The role of mobility within the risk management strategies of pastoralists and Agro-  
510 pastoralists.
- 511 Tanaka, G., Urabe, C., Aihara, K., 2014. Random and targeted interventions for epidemic control in  
512 metapopulation models. *Scientific reports* 4, 5522.
- 513 Turner, M.D., Schlecht, E., 2019. Livestock mobility in sub-Saharan Africa: A critical review. *Pastoralism* 9,  
514 13.
- 515 VanderWaal, K., Gilbertson, M., Okanga, S., Allan, B.F., Craft, M.E., 2017. Seasonality and pathogen  
516 transmission in pastoral cattle contact networks. *R Soc Open Sci* 4, 170808.
- 517 VanderWaal, K.L., Picasso, C., Enns, E.A., Craft, M.E., Alvarez, J., Fernandez, F., Gil, A., Perez, A., Wells, S.,  
518 2016. Network analysis of cattle movements in Uruguay: Quantifying heterogeneity for risk-based  
519 disease surveillance and control. *Prev Vet Med* 123, 12-22.
- 520 Volkova, V.V., Howey, R., Savill, N.J., Woolhouse, M.E., 2010. Sheep movement networks and the  
521 transmission of infectious diseases. *PLoS One* 5, e11185.
- 522 Wasserman, S., Faust, K., 1994. *Social network analysis: Methods and applications*. Cambridge university  
523 press.
- 524 Watts, S.J., 1987. Population mobility and disease transmission: the example of guinea worm. *Social*  
525 *Science & Medicine* 25, 1073-1081.
- 526 Woolhouse, M.E., Dye, C., Etard, J.F., Smith, T., Charlwood, J.D., Garnett, G.P., Hagan, P., Hii, J.L., Ndhlovu,  
527 P.D., Quinnell, R.J., Watts, C.H., Chandiwana, S.K., Anderson, R.M., 1997. Heterogeneities in the  
528 transmission of infectious agents: implications for the design of control programs. *Proc Natl Acad*  
529 *Sci U S A* 94, 338-342.
- 530 Yang, Y., McKhann, A., Chen, S., Harling, G., Onnela, J.P., 2019. Efficient vaccination strategies for epidemic  
531 control using network information. *Epidemics* 27, 115-122.
- 532 zu Dohna, H., Peck, D.E., Johnson, B.K., Reeves, A., Schumaker, B.A., 2014. Wildlife-livestock interactions in  
533 a western rangeland setting: quantifying disease-relevant contacts. *Prev Vet Med* 113, 447-456.

534

535
